# Supplementary material for: Momelotinib versus Continued Ruxolitinib or Best Available Therapy in JAK Inhibitor-Experienced Patients with Myelofibrosis and Anemia: Subgroup Analysis of SIMPLIFY-2
Source: PubMed Central journal article supplement (PMC11349857; doi:10.1007/s12325-024-02928-4), 2024-07-11

## **Supplementary Material for:**

Momelotinib vs continued ruxolitinib or best available therapy in JAK inhibitor–experienced patients with myelofibrosis and anemia: subgroup analysis of SIMPLIFY-2

Claire N. Harrison,<sup>1</sup> Alessandro M. Vannucchi,<sup>2</sup> Christian Recher,<sup>3</sup> Francesco Passamonti,<sup>4</sup> Aaron T. Gerds,<sup>5</sup> Juan Carlos Hernandez-Boluda,<sup>6</sup> Abdulraheem Yacoub,<sup>7</sup> Shireen Sirhan,<sup>8</sup> Catherine Ellis,<sup>9</sup> Bharat Patel,<sup>9</sup> Bryan Strouse,<sup>9</sup> Uwe Platzbecker<sup>10</sup>

<sup>1</sup>Guy's and St Thomas' NHS Foundation Trust, London, UK; <sup>2</sup>University of Florence, Florence, Italy; <sup>3</sup>University Hospital Center (CHU) of Toulouse, Toulouse, France; <sup>4</sup>University of Milan Statale, Milan, Italy; <sup>5</sup>Cleveland Clinic Taussig Cancer Institute, Cleveland, OH, USA; <sup>6</sup>Hospital Clinico de Valencia-INCLIVA, University of Medicine, Valencia, Spain; <sup>7</sup>University of Kansas, Kansas City, KS, USA; <sup>8</sup>Jewish General Hospital, McGill University, Montreal, QC, Canada; <sup>9</sup>GSK plc, Philadelphia, PA, USA; <sup>10</sup>University Hospital Leipzig, Leipzig, Germany

**Corresponding Author:** Claire Harrison, [claire.harrison@gstt.nhs.uk](mailto:claire.harrison@gstt.nhs.uk)

### List of SIMPLIFY-2 Investigators

**Canada:** Vikas Gupta, Brian Leber, Elena Liew, Shireen Sirhan; **France:** Fiorenza Barraco, Nathalie Cambier, Viviane Dubruille, Jean-Jacques Kiladjian, Christian Recher, Jerome Rey, Vincent Ribrag, Philippe Rodon; **Germany:** Philipp Jost, Uwe Platzbecker, Andreas Reiter, Philippe Schafhausen, Christof Scheid, Cornelius Waller; **Israel:** Dina Ben Yehuda, Andrei Braester, Martin Ellis, Ilya Kirgner, Gilles Lugassy, Elena Mishchenko, Arnon Nagler, Meir Preis, Jacon Rowe; **Italy:** Giuliana Alimena, Michele Cavo, Agostino Cortelezzi, Gianluca Gaidano, Marco Gobi, Francesco Passamonti, Marco Ruggeri, Alessandro Vannucchi; **Spain:** Rose Ayala, Francisco Cervantes, Pilar Giraldo, Juan Carlos Hernandez-Boluda, Jesus Maria Hernandez Rivas, Cristina Motillo, Blanca Xicoy; **UK:** David Bowen, Joanne Ewing, Mamta Garg, Claire Harrison, Dragana Milojkovic, Timothy Somerville; **USA:** Murat Arcasoy, Maria Baer, Dmitriy Berenzon, Randall Brown, Catherine Cargo, Salman Fazal, Aaron Gerds, Mark Heaney, Daniel Huang, Carole Miller, Stephen Oh, Gary Schiller, Elliot Winton, Srdan Verstovsek, Abdulraheem Yacoub, Cecilia Yi

### List of Institutional Review Boards/Ethics Committees

| <b>Study Site Number</b> | <b>Institutional Review Board/Ethics Committee Name</b>                   |
|--------------------------|---------------------------------------------------------------------------|
| 9012                     | Institutional Helsinki Committee, Shaare Zedek Medical Center             |
| 9865                     | Carmel Medical Center Helsinki Committee/IRB Carmel MC Helsinki Committee |
| 9804                     | Institutional Helsinki Committee, The Chaim Sheba Medical Center          |
| 15064                    | Institutional Helsinki Committee                                          |
| 8483                     | Institutional Helsinki Committee, Barzilai Medical Center                 |
| 8229                     | Institutional Helsinki Committee, Tel-Aviv Sourasky Medical Center        |
| 9806                     | Institutional Helsinki Committee, Rabin Medical Center, -Belinson Campus  |
| 9805                     | Institutional Helsinki Committee, Meir Medical Center                     |
| 8766                     | Institutional Helsinki Committee, Galilee Medical Center                  |
| 8195                     | Institutional Helsinki Committee, Hadassah Medical Center                 |

|                                                                                      |                                                                                                                       |
|--------------------------------------------------------------------------------------|-----------------------------------------------------------------------------------------------------------------------|
| 8861<br>9008<br>8974<br>9059<br>8768<br>9024<br>8680<br>8689<br>8828<br>8872<br>3891 | CPP ILE DE France 1                                                                                                   |
| 8834<br>8982<br>8781<br>8886<br>8981<br>9579<br>9365                                 | Ethik-Kommission der Ärztekammer Westfalen- Lippe und der Westfälischen Wilhelms-Universität Münster                  |
| 15480<br>8781                                                                        | Ethik-Kommission an der Technischen Universität Dresden                                                               |
| 8834                                                                                 | Ethik-Kommission der Ärztekammer Westfalen- Lippe und der Medizinischen Fakultät der WWU Münster                      |
| 8886                                                                                 | Universitätsklinikum Mannheim gGmbH, Medizinische Ethik-Kommission II                                                 |
| 8981                                                                                 | Ethik-Kommission der Ärztekammer Hamburg                                                                              |
| 8982                                                                                 | Ethik-Kommission der Fakultät für Medizin der Technischen Universität München                                         |
| 9365                                                                                 | Ethikkommission der Albert-Ludwigs-Universität Freiburg                                                               |
| 9579                                                                                 | Ethikkommission der Medizinischen Fakultät der Universität zu Köln                                                    |
| 9400<br>7706<br>8747<br>10344<br>7875<br>5427<br>8780<br>8783                        | Comitato Etico Area Vasta Azienda Ospedaliero-Universitaria Careggi Pad. 3 - Nuovo Ingresso Careggi (NIC) – Didattica |

|                                               |                                                                                                                            |
|-----------------------------------------------|----------------------------------------------------------------------------------------------------------------------------|
| 8685                                          |                                                                                                                            |
| 9400                                          | Comitato Etico dell'Università "Sapienza" (Policlinico Universitario Umberto I - A.O. Sant' Andrea)                        |
| 7706                                          | Comitato Etico di Area Vasta Emilia Centro Azienda Ospedaliero-Universitaria Policlinico Sant'Orsola – Malpighi di Bologna |
| 8747                                          | Comitato Etico Interaziendale A.O.U. San Luigi Gonzaga                                                                     |
| 10344                                         | Comitato Etico Milano Area 2, Fondazione IRCCS Ca' Granda Ospedale Maggiore Policlinico                                    |
| 7875                                          | Comitato Etico Interaziendale AOU Maggiore della Carita di Novara                                                          |
| 5427                                          | Comitato Etico Regionale della Liguria (Sezione 2), Ospedale Policlinico San Martino                                       |
| 8780                                          | President of Comitato Etico dell'Insubria                                                                                  |
| 8783                                          | Comitato Etico per la Sperimentazione Clinica della Provincia di Vicenza                                                   |
| 9366<br>8950<br>8958<br>8771<br>9876<br>9914  | CEIC Hospital Clinic de Barcelona-CEC                                                                                      |
| 10015<br>9336<br>9013<br>9335<br>9102<br>9361 | West Midlands – Edgbaston Research Ethics Committee (REC)                                                                  |
| 8156                                          | Sir Mortimer B.Davis-Jewish General Hospital                                                                               |
| 9920                                          | University of Alberta Health Research Ethics Board                                                                         |
| 8949                                          | Hamilton Integrated Research Ethics Board                                                                                  |
| 8155                                          | University Health Network Research Ethics Board                                                                            |

|                              |                                                                             |
|------------------------------|-----------------------------------------------------------------------------|
| 9282                         | University of Kansas Human Subjects Committee                               |
| 9293                         | Brookdale University Hospital and Medical Center                            |
| 5576                         | The University of Texas MD Anderson Cancer Center, Institution Review Board |
| 9334                         | Rush University Medical Center IRB                                          |
| 8863                         | UCLA Office of Human Research Protection Program                            |
| 7034                         | Washington University HRPO                                                  |
| 8808                         | Columbia University Medical Center IRB                                      |
| 9887                         | The Cleveland Clinic Institutional Review Board Cleveland Clinic Foundation |
| 10948                        | Cleveland Clinic Foundation, Institutional Review Board                     |
| 9748<br>8874<br>8956<br>8810 | Quorum Review, Inc.                                                         |
| 8881<br>9704                 | Western Institutional Review Board (WIRB)                                   |

**Table S1. Safety summary and most common AEs during the randomized period in the baseline Hb <100 g/L and non-TI subgroups**

| n (%)                                                                        | Baseline Hb <100 g/L |                | Baseline non-TI    |                |
|------------------------------------------------------------------------------|----------------------|----------------|--------------------|----------------|
|                                                                              | Momelotinib (n=66)   | BAT/RUX (n=39) | Momelotinib (n=72) | BAT/RUX (n=33) |
| <b>Any-grade TEAE</b>                                                        | 66 (100)             | 35 (89.7)      | 71 (98.6)          | 30 (90.9)      |
| Grade ≥3 TEAE                                                                | 40 (60.6)            | 18 (46.2)      | 45 (62.5)          | 14 (42.4)      |
| <b>Treatment-related AE</b>                                                  | 49 (74.2)            | 15 (38.5)      | 52 (72.2)          | 11 (33.3)      |
| Grade ≥3 treatment-related AE                                                | 20 (30.3)            | 8 (20.5)       | 22 (30.6)          | 6 (18.2)       |
| <b>Serious TEAE</b>                                                          | 23 (34.8)            | 9 (23.1)       | 27 (37.5)          | 8 (24.2)       |
| Treatment-related serious AE                                                 | 7 (10.6)             | 2 (5.1)        | 9 (12.5)           | 1 (3.0)        |
| <b>TEAE leading to discontinuation<sup>a</sup></b>                           | 14 (21.2)            | 1 (2.6)        | 17 (23.6)          | 1 (3.0)        |
| <b>TEAE leading to dose reduction/interruption</b>                           | 9 (13.6)             | 8 (20.5)       | 9 (12.5)           | 6 (18.2)       |
| <b>TEAE leading to death</b>                                                 | 4 (6.1)              | 4 (10.3)       | 5 (6.9)            | 3 (9.1)        |
| <b>Most common TEAEs (&gt;10% of the momelotinib arm in either subgroup)</b> |                      |                |                    |                |
| Diarrhea                                                                     | 21 (31.8)            | 5 (12.8)       | 23 (31.9)          | 5 (15.2)       |
| Anemia                                                                       | 13 (19.7)            | 10 (25.6)      | 13 (18.1)          | 5 (15.2)       |
| Asthenia                                                                     | 13 (19.7)            | 8 (20.5)       | 15 (20.8)          | 7 (21.2)       |
| Nausea                                                                       | 12 (18.2)            | 3 (7.7)        | 12 (16.7)          | 1 (3.0)        |
| Dizziness                                                                    | 11 (16.7)            | 3 (7.7)        | 11 (15.3)          | 2 (6.1)        |
| Pyrexia                                                                      | 11 (16.7)            | 3 (7.7)        | 14 (19.4)          | 4 (12.1)       |
| Thrombocytopenia                                                             | 11 (16.7)            | 4 (10.3)       | 11 (15.3)          | 4 (12.1)       |
| Abdominal pain                                                               | 10 (15.2)            | 5 (12.8)       | 11 (15.3)          | 3 (9.1)        |
| Fatigue                                                                      | 10 (15.2)            | 7 (17.9)       | 9 (12.5)           | 6 (18.2)       |
| Pruritus                                                                     | 10 (15.2)            | 3 (7.7)        | 10 (13.9)          | 2 (6.1)        |
| Cough                                                                        | 9 (13.6)             | 4 (10.3)       | 11 (15.3)          | 3 (9.1)        |
| Arthralgia                                                                   | 8 (12.1)             | 3 (7.7)        | 8 (11.1)           | 2 (6.1)        |
| Dyspnea                                                                      | 8 (12.1)             | 6 (15.4)       | 10 (13.9)          | 4 (12.1)       |
| Headache                                                                     | 8 (12.1)             | 3 (7.7)        | 10 (13.9)          | 1 (3.0)        |
| Peripheral edema                                                             | 8 (12.1)             | 5 (12.8)       | 10 (13.9)          | 4 (12.1)       |
| Dyspepsia                                                                    | 7 (10.6)             | 0              | 8 (11.1)           | 0              |
| Neutropenia                                                                  | 7 (10.6)             | 1 (2.6)        | 7 (9.7)            | 0              |
| Weight decreased                                                             | 7 (10.6)             | 1 (2.6)        | 8 (11.1)           | 2 (6.1)        |
| Upper respiratory tract infection                                            | 7 (10.6)             | 3 (7.7)        | 5 (6.9)            | 2 (6.1)        |
| Vitamin B <sub>1</sub> deficiency <sup>b</sup>                               | 7 (10.6)             | 1 (2.6)        | 6 (8.3)            | 1 (3.0)        |
| Peripheral sensory neuropathy                                                | 6 (9.1)              | 0              | 8 (11.1)           | 0              |
| Urinary tract infection                                                      | 6 (9.1)              | 3 (7.7)        | 9 (12.5)           | 4 (12.1)       |

AE, adverse event; BAT/RUX, best available therapy/ruxolitinib; Hb, hemoglobin; TEAE, treatment-emergent adverse event; TI, transfusion independent.

<sup>a</sup> Discontinuation of BAT was inconsistently reported because changes in therapy or intentional absence of therapy were permissible options for this treatment group. <sup>b</sup> All AEs of decreased vitamin B<sub>1</sub>/vitamin B<sub>1</sub> deficiency were grade 1/2; no AEs of Wernicke encephalopathy were reported.

**Figure S1. Mean daily dose intensity over time in the baseline Hb <100 g/L and non-TI subgroups.** Shown are mean daily doses of momelotinib (A and C) and ruxolitinib (in the BAT arm; B and D). BAT, best available therapy; Hb, hemoglobin; TI, transfusion independent.

A.

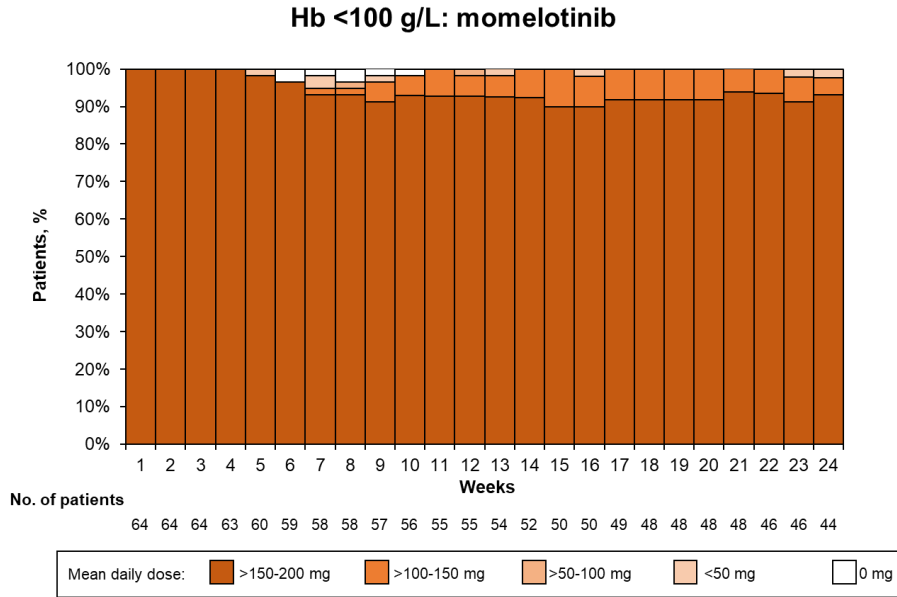

B.

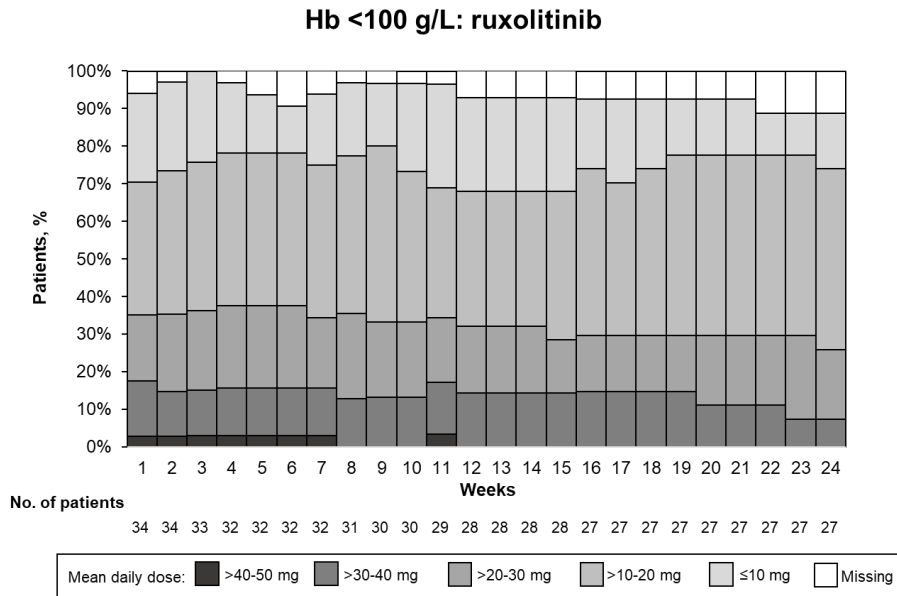

C.

**Non-TI: momelotinib**

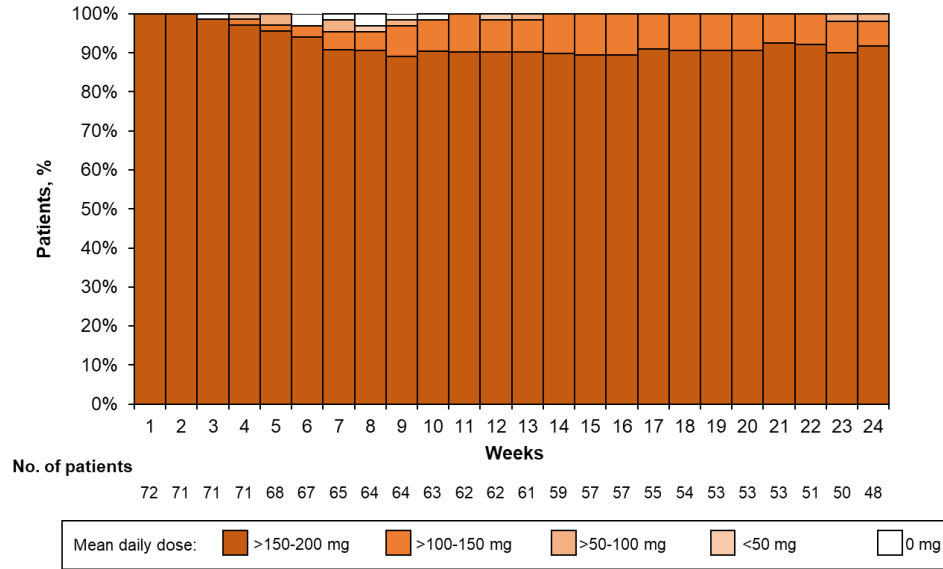

D.

**Non-TI: ruxolitinib**

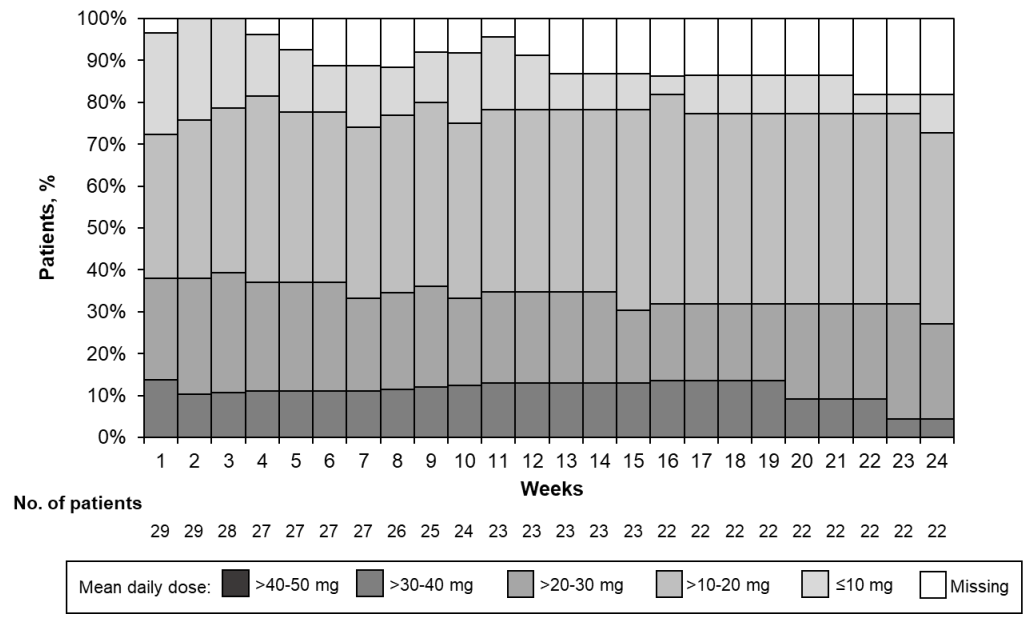



**Figure S2. Week 24 transfusion independence by baseline EPO level (< or  $\geq 100$ , < or  $\geq 500$  IU/L) in the baseline Hb <100 g/L (A) and non-TI (B) subgroups.**

Transfusion independence at week 24 (terminal 12-week definition; defined as no RBC transfusions and no Hb of <80 g/L in the last 12 weeks before week 24) or by week 24 (rolling 12-week definition; defined as no RBC transfusions and no Hb of <80 g/L during any 12-week period through week 24). BAT, best available therapy; EPO, erythropoietin; Hb, hemoglobin; RBC, red blood cell; TI, transfusion independent.

A.

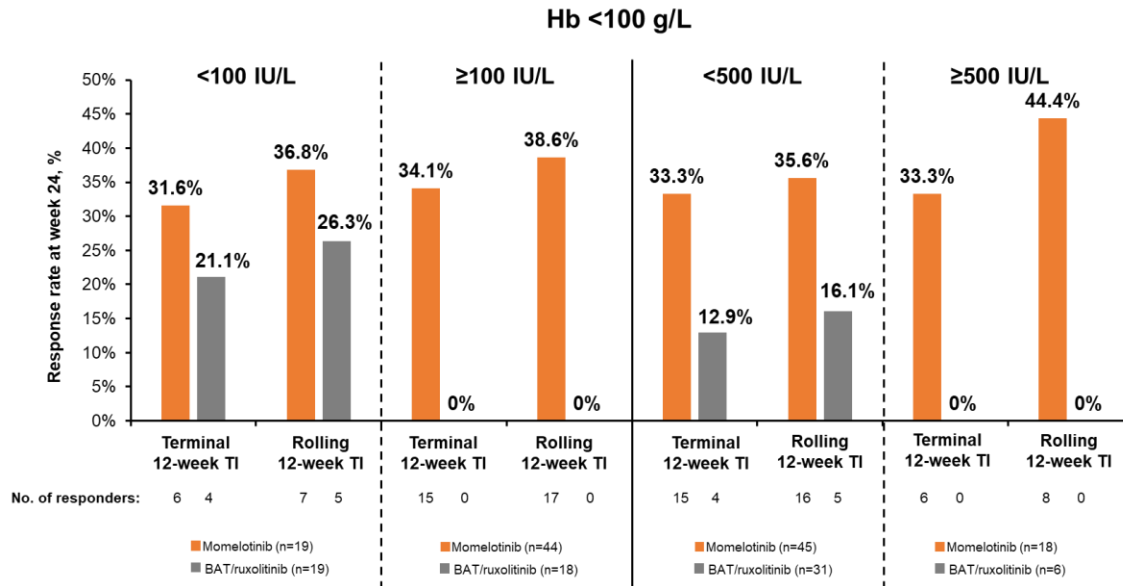

B.

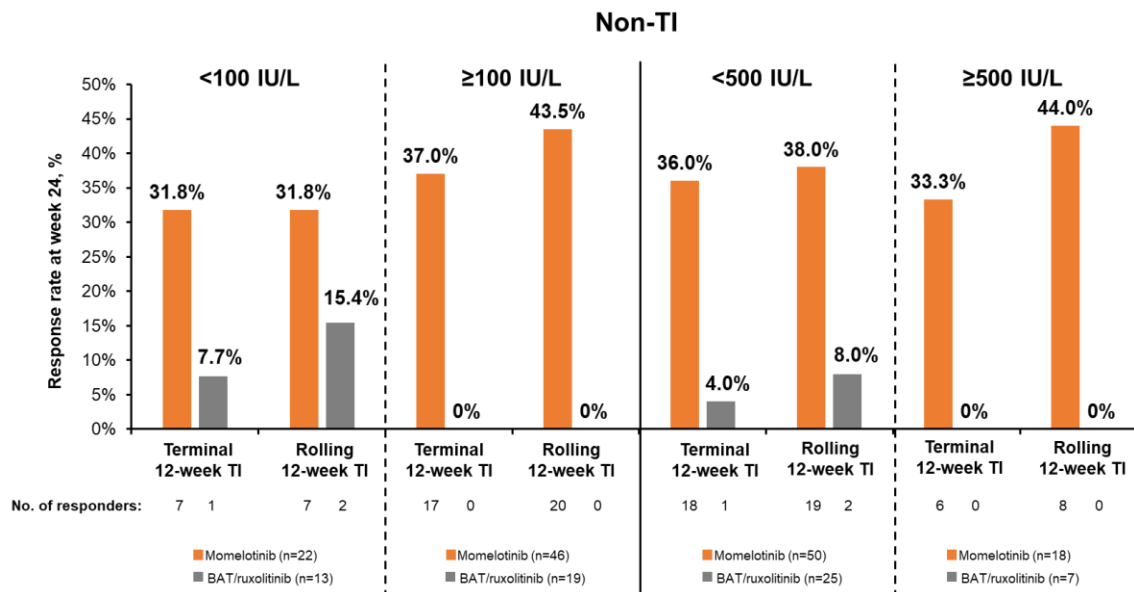

**Figure S3. Dual and triple response rates (SVR35, TSS50, and TI-R [terminal 12-week definition]) in the baseline Hb <100 g/L (A) and non-TI (B) subgroups. BAT, best available therapy; Hb, hemoglobin; SVR35, spleen volume reduction ≥35%; TI, transfusion independent; TI-R, transfusion independence response; TSS50, Total Symptom Score reduction ≥50%.**

A.

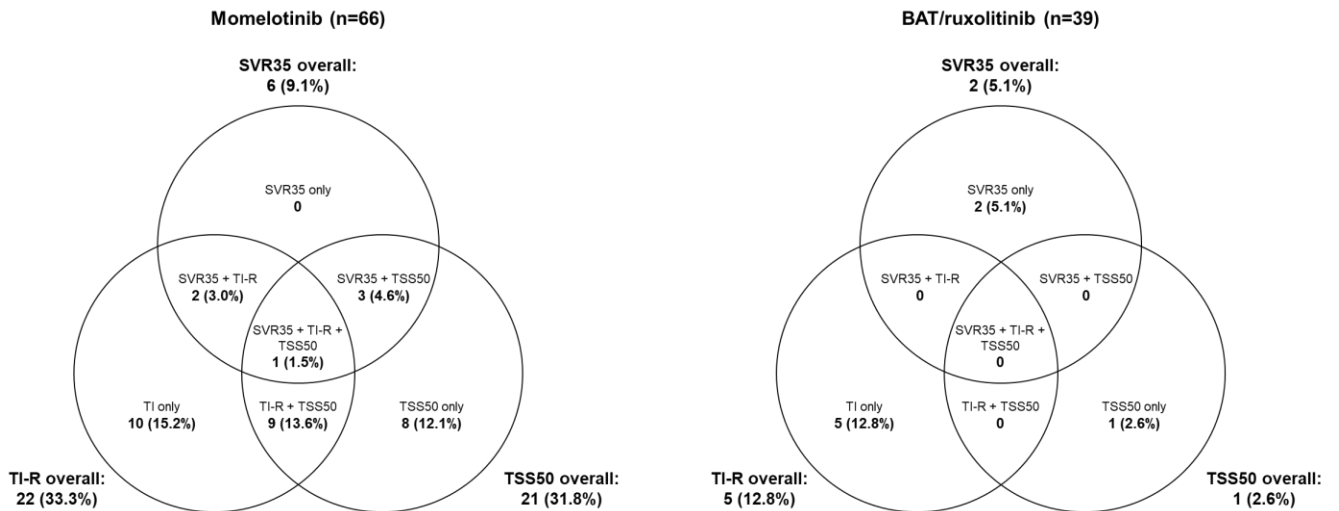

B.

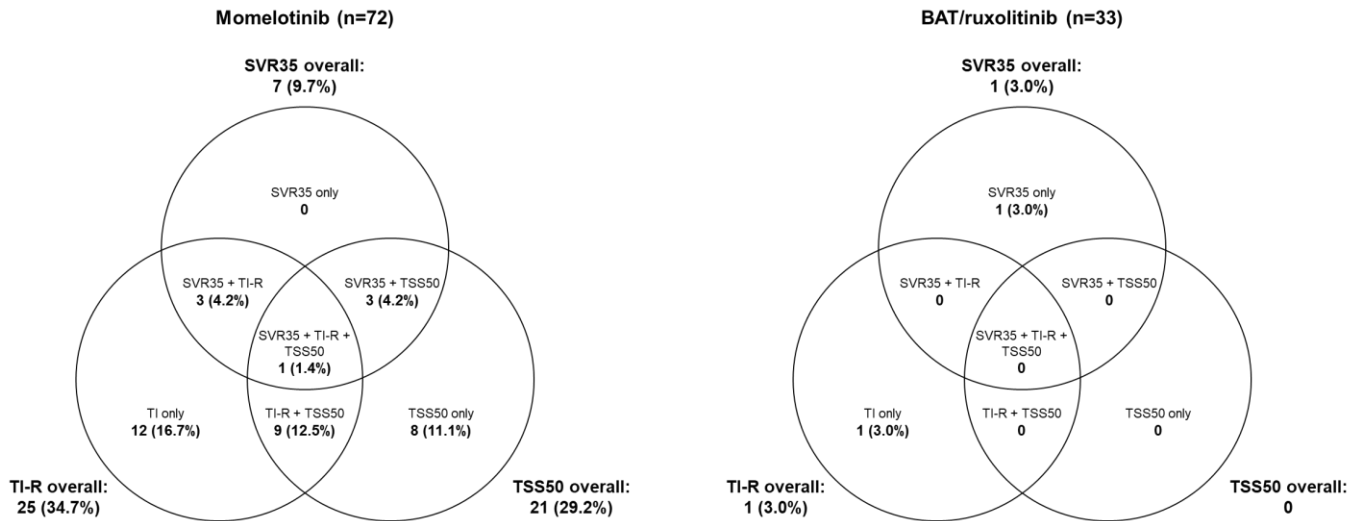

Supplement: 12325_2024_2928_MOESM1_ESM.pdf [file 12325_2024_2928_MOESM1_ESM.pdf]
